# Supplementary material
Source: MDPI journal article supplement (https://www.mdpi.com/2073-4344/9/10/806)
Supplement: s1 [file s1]

Supplementary Materials

Cobalt oxide catalysts on stainless steel meshes prepared by magnetron sputtering: performance in ethanol oxidation

K. Jirátová1*, R. Perekrestov2, M. Dvořáková3, J. Balabánová1, P. Topka1, M. Koštejn1, J. Olejníček2, M. Čada2, Z. Hubička2, F. Kovanda3

1Institute of Chemical Process Fundamentals of the CAS, v.v.i., Rozvojová 135, 165 02 Prague, Czech Republic

2Institute of Physics of the CAS, v.v.i., Na Slovance 2, 182 21 Prague, Czech Republic

3Department of Solid State Chemistry, University of Chemistry and Technology, Technická 5, 166 28 Prague, Czech Republic


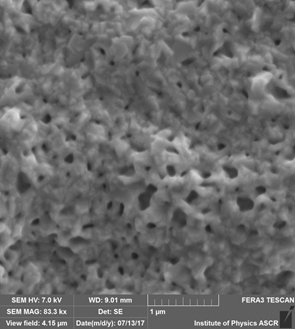


**a**


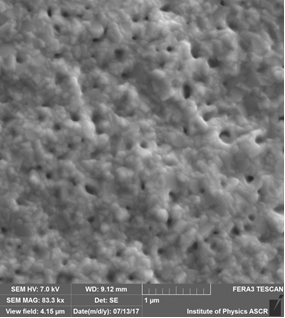


**b**


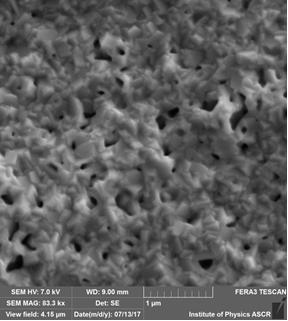


**c**


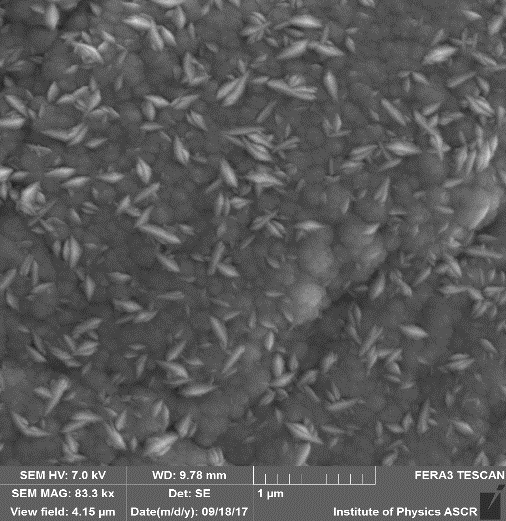


**d**


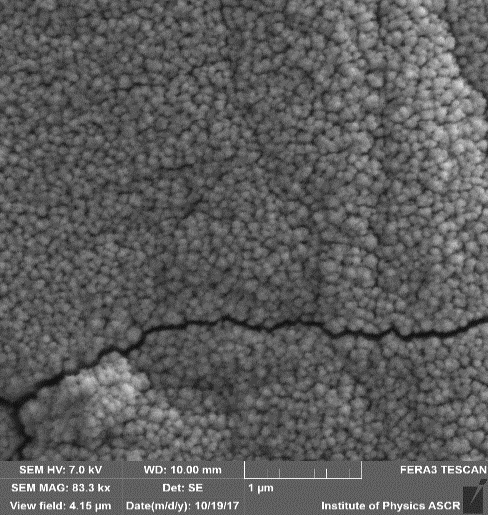


**e**


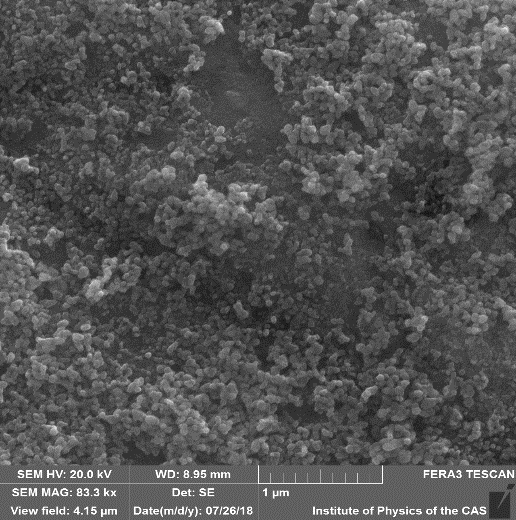


**f**


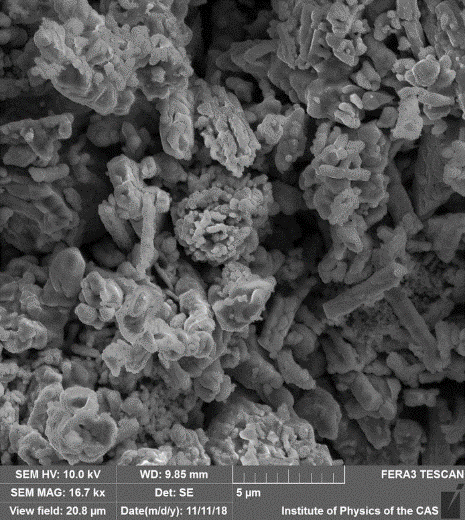


**g**

Figure S1***:*** SEM images documenting surface morphology of the prepared catalysts: a) Co-RF-1, b) Co-RF-2, c) Co-RF-3, d) Co-RF-ox/ap, e) Co-RF-ox, f) Co-I, and g) pelletized commercial Co3O4 (PEL)
